# Supplementary material
Source: PubMed Central journal article supplement (PMC5819357)
Supplement: NIHMS937020-supplement-5.pdf [file NIHMS937020-supplement-5.pdf]

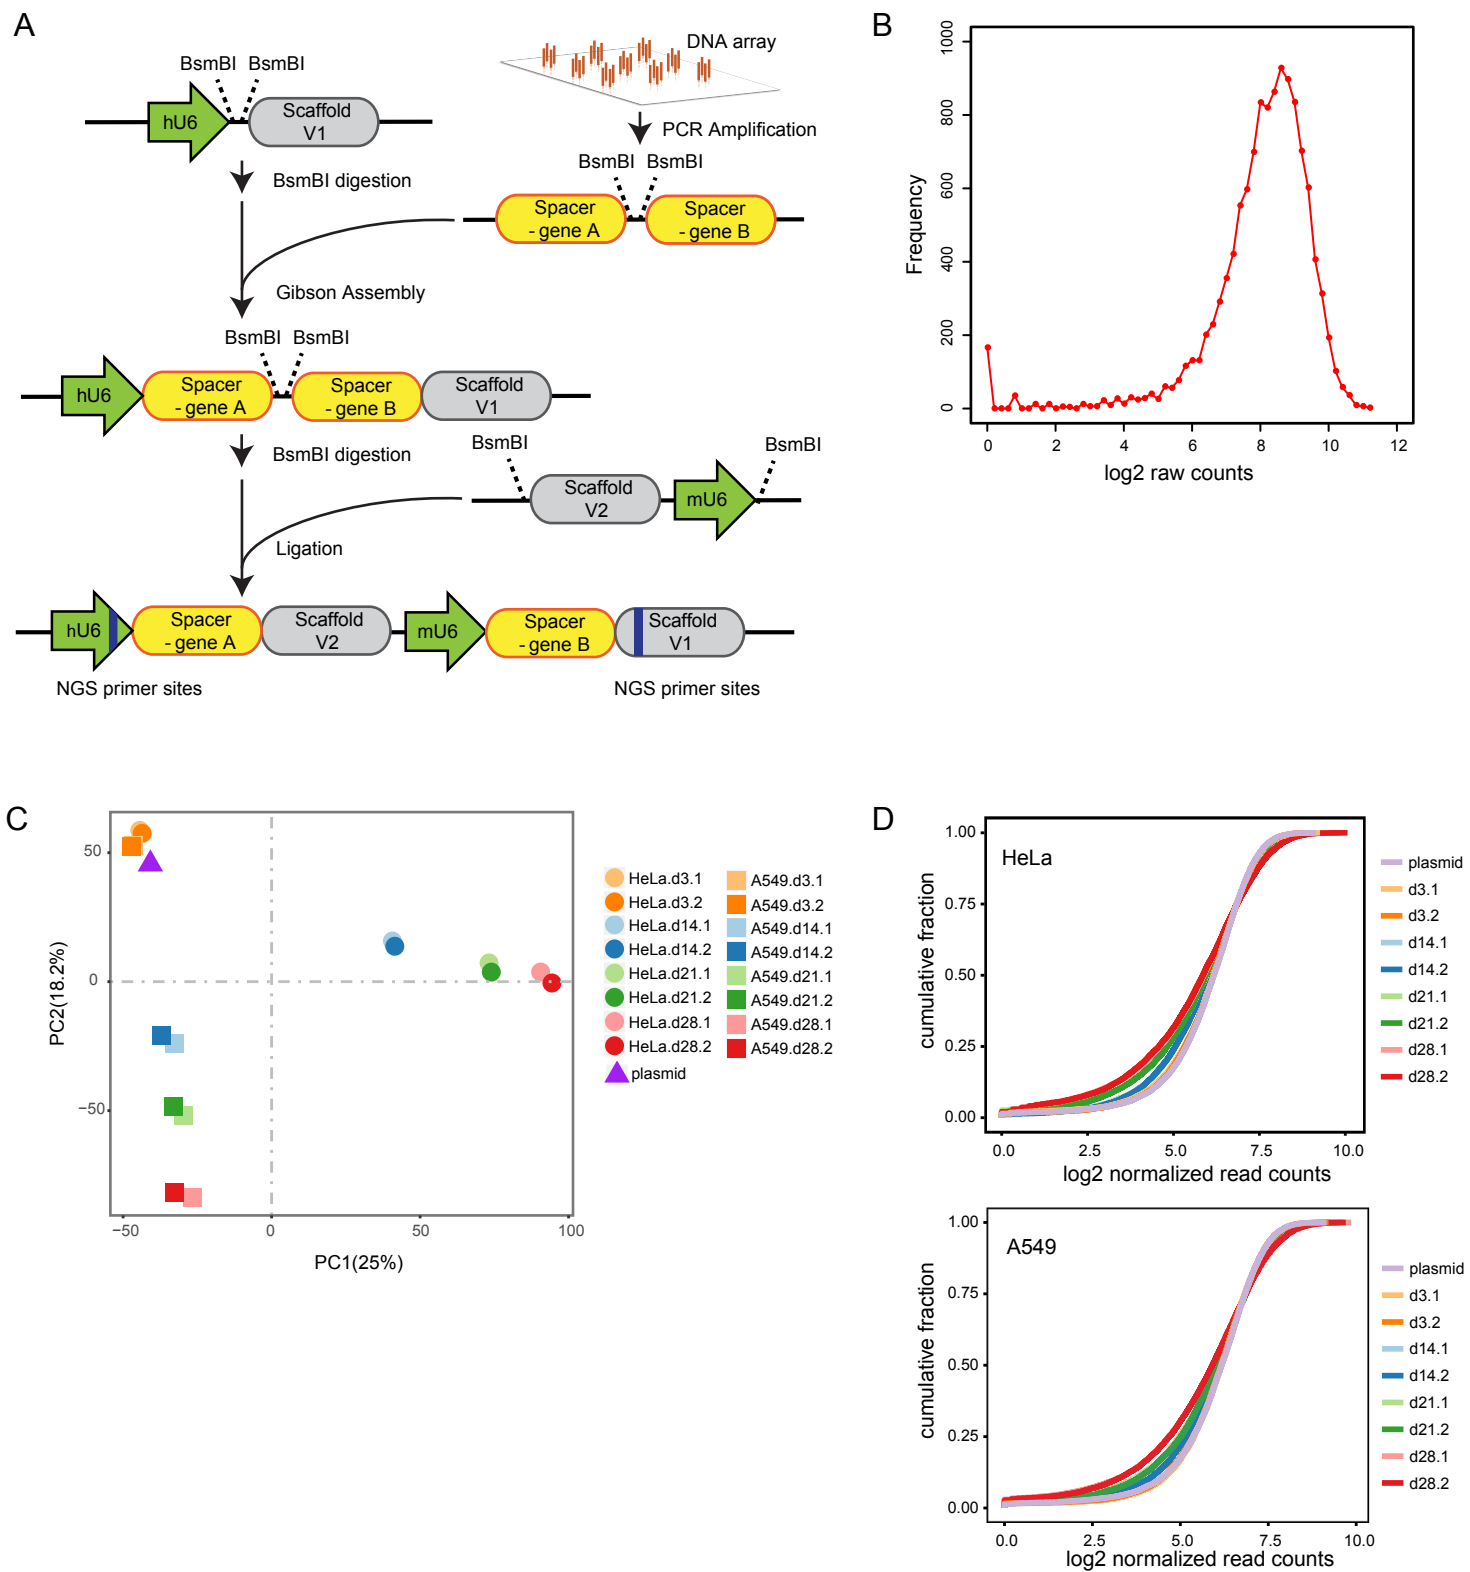

Figure S1.

**Figure S1. Schematic of dual-gRNA-library construction and quality control of screens; related to Figure 1.** (A) Oligonucleotides bearing two sgRNA spacers were synthesized, amplified, and cloned into a lentiviral gRNA cloning vector. Next, a fragment containing a sgRNA scaffold and the mouse U6 promoter was inserted between the two spacers to yield the final dual-gRNA expression construct. A pair of primer matching sites labeled in blue were designed for enrichment of the two spacer regions prior to deep sequencing analysis. (B) Frequency distribution of the metabolism dual-gRNA plasmid library. (C) Principle component analysis (PCA) of the dual-gRNA read count distributions. (D) Cumulative frequency of dual-gRNA constructs by deep sequencing. Shift in the curves at days 14, 21, and 28 represents the depletion of dual-gRNA constructs. Each time point was measured in duplicates.

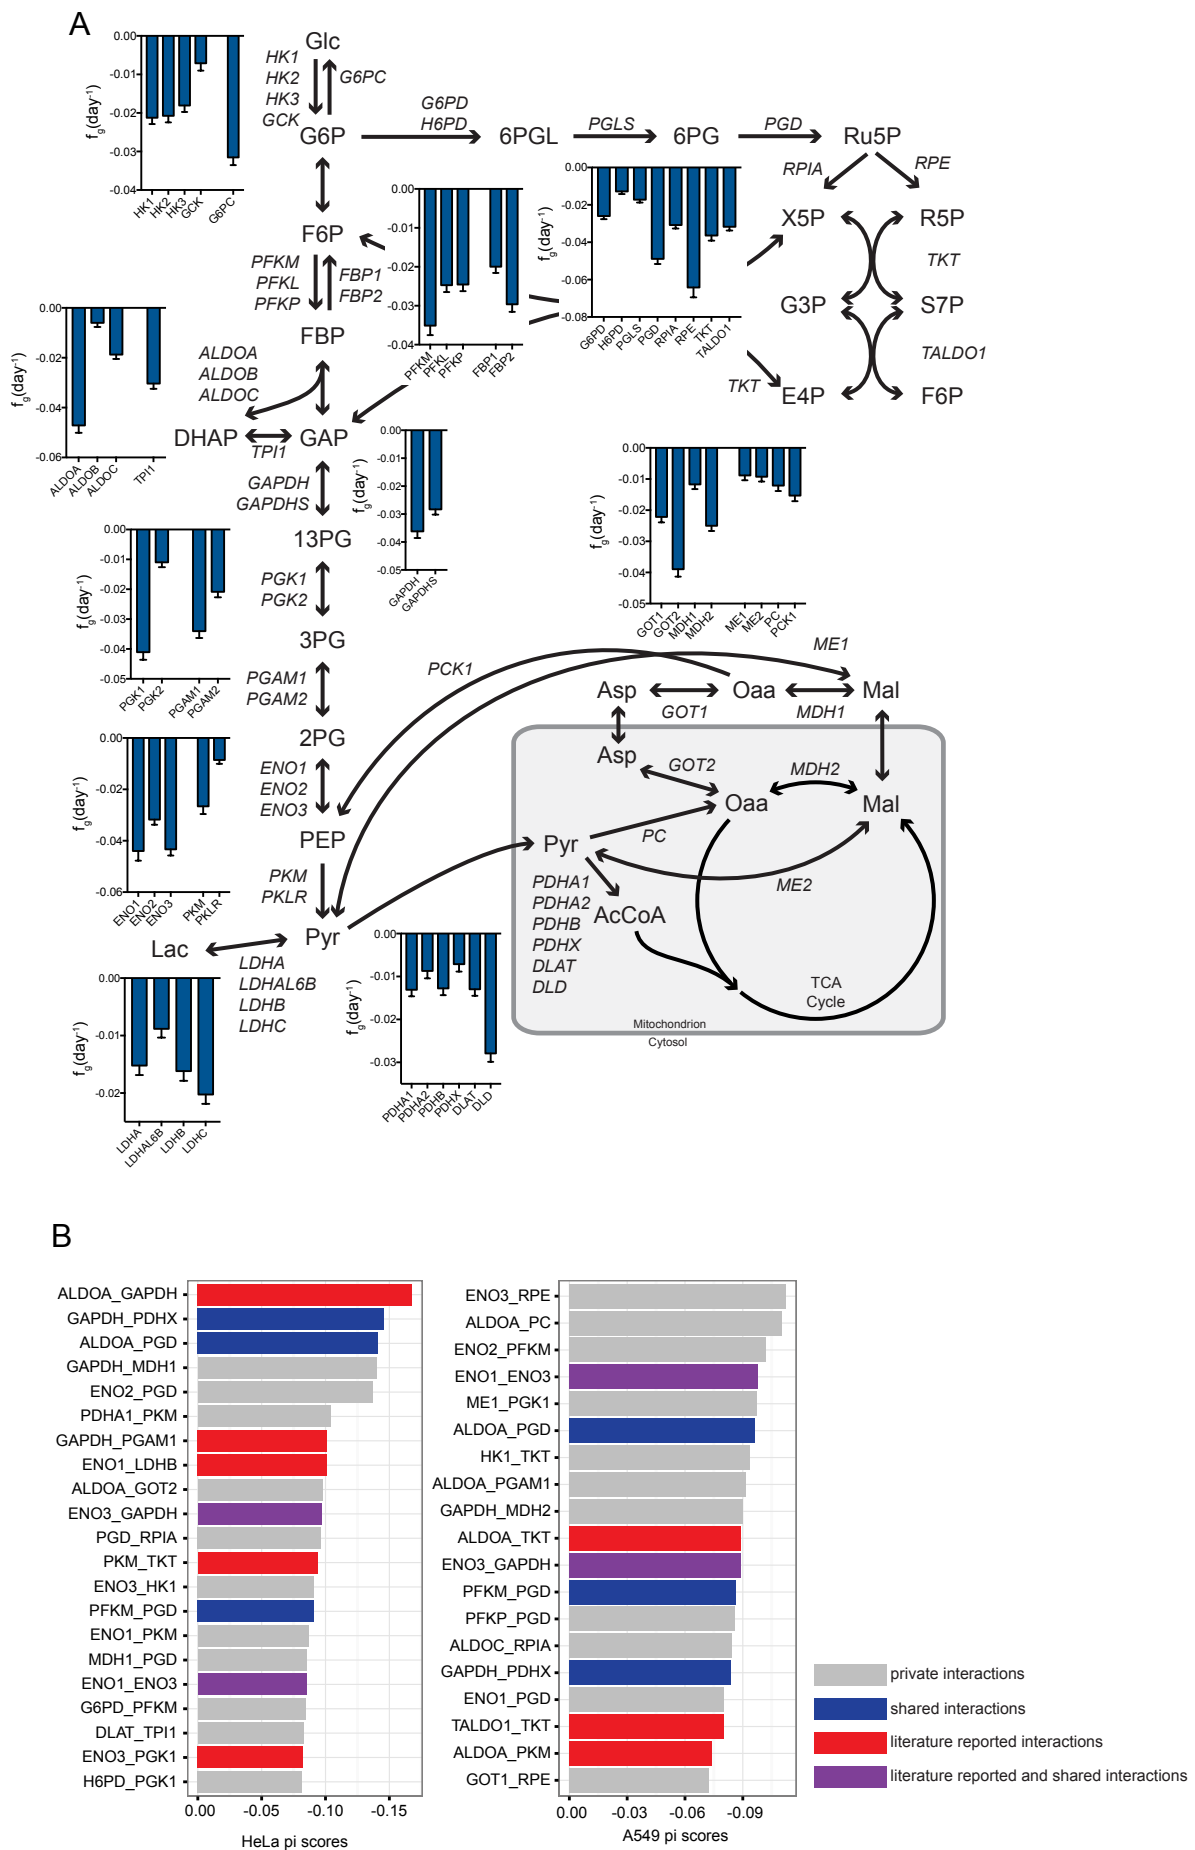

Figure S2.

**Figure S2. CRISPR screening results reveal metabolic network dependencies; related to Figure 2.** (A) SKO fitness scores for A549 cells, plotted as  $f_g$  ( $\text{day}^{-1}$ ), with a more negative score representing a decrease in fitness with SKO. Plotted as mean  $\pm$  SD. (B) Gene pairs with significant genetic interaction scores (z-score  $< -3$ ) are shown. Conserved interactions cross HeLa and A549 are indicated in blue. Previously reported interactions are indicated in red. Purple indicates the conserved interactions which have been previously reported.

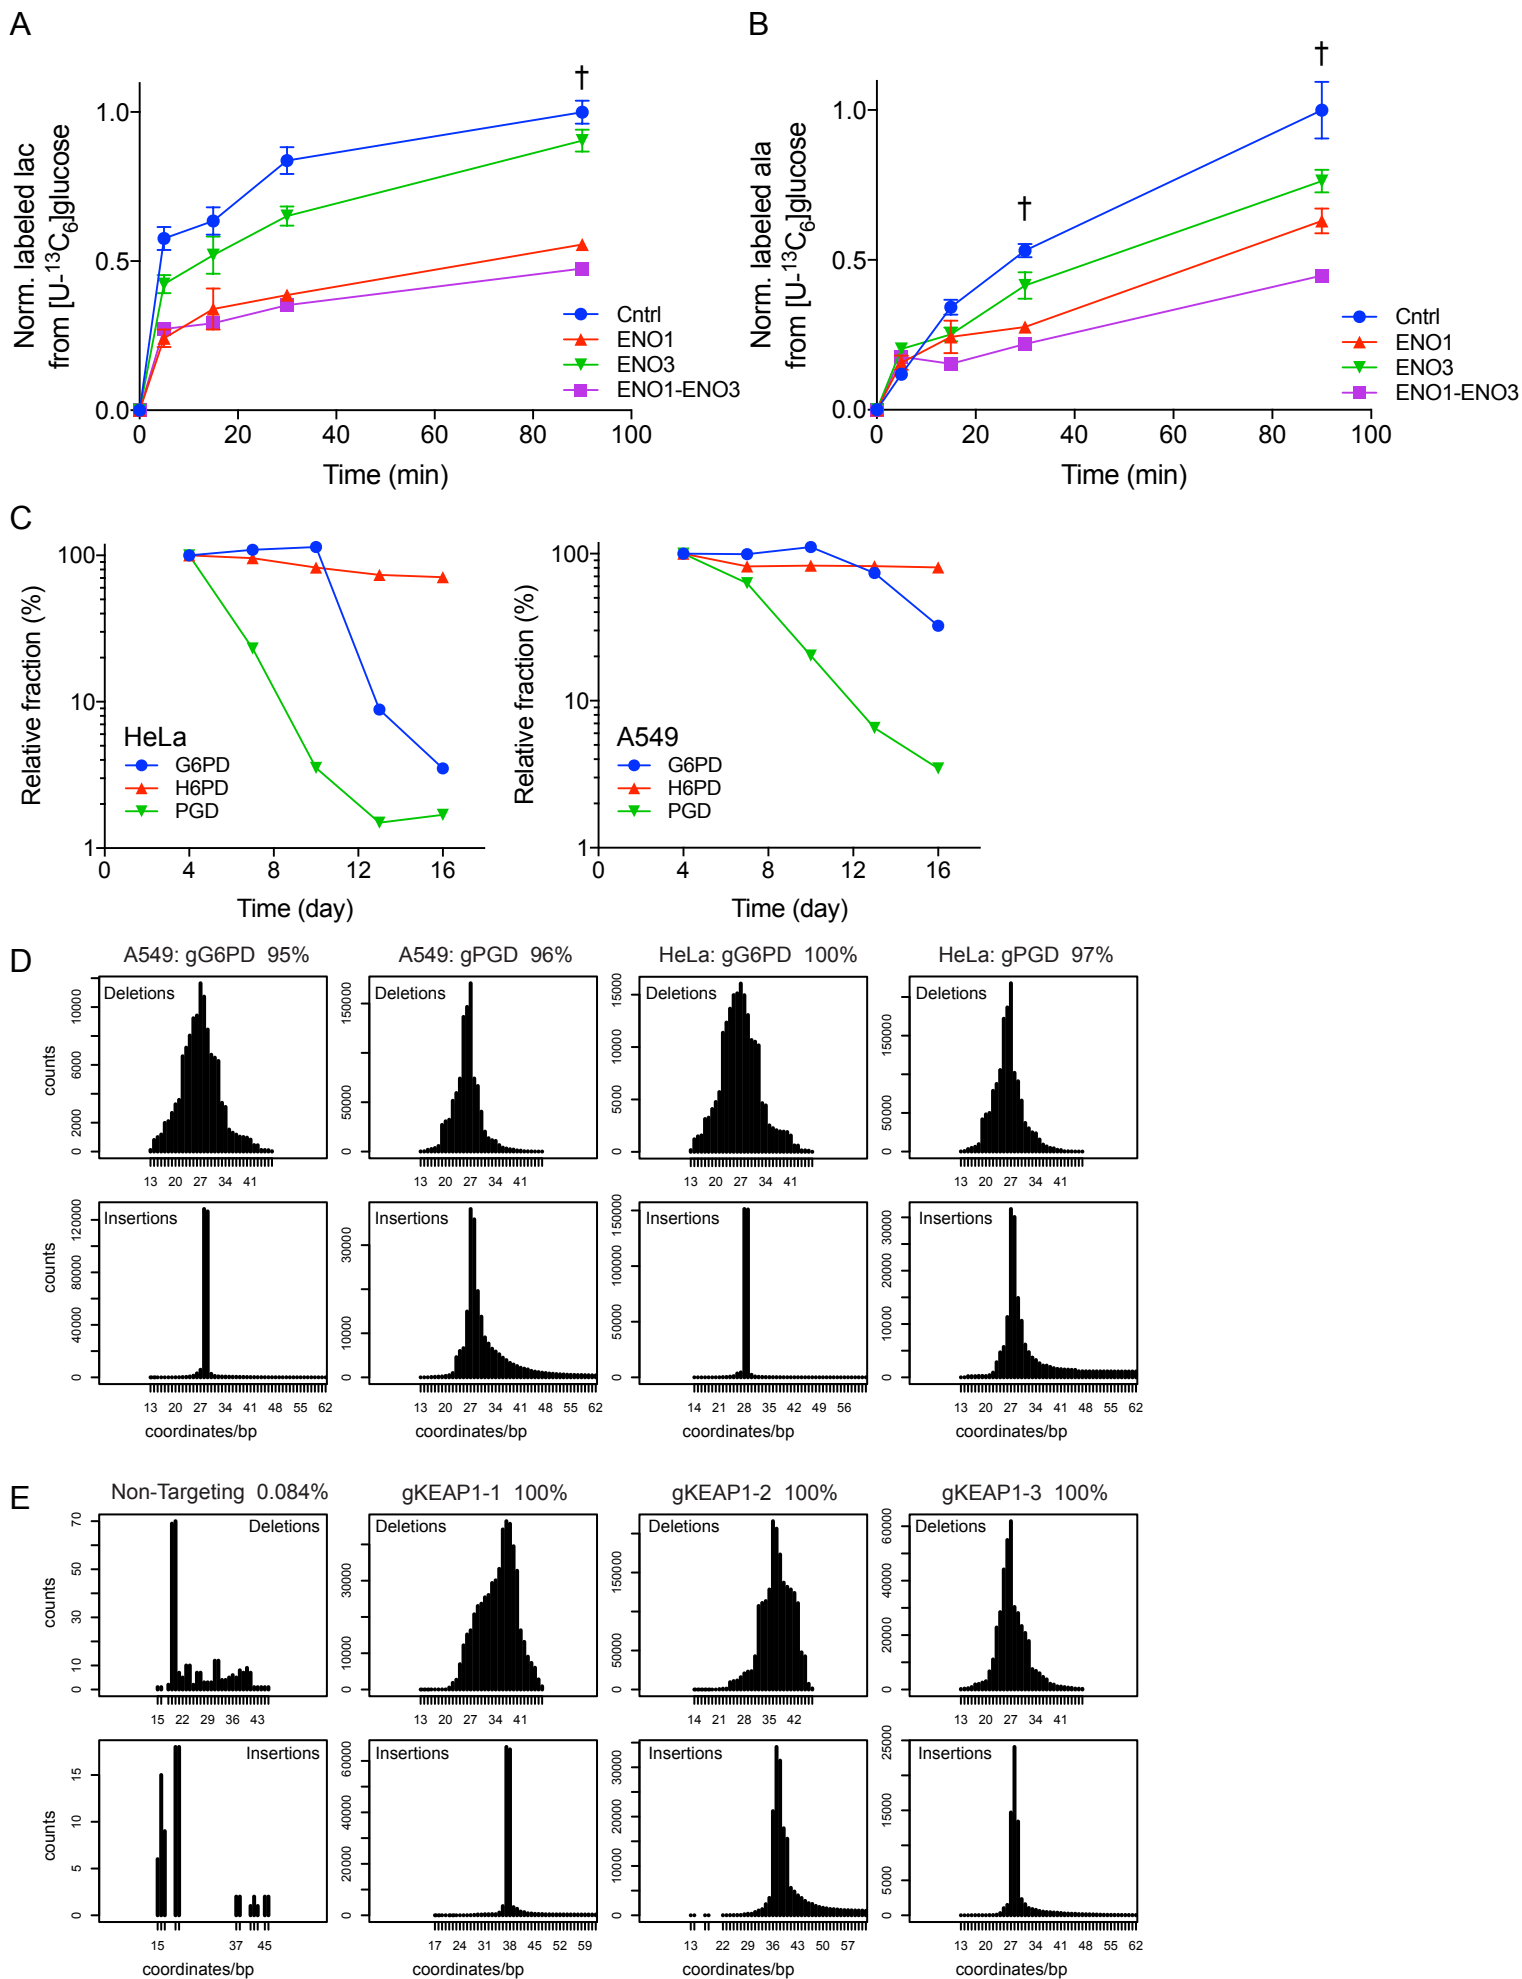

Figure S3.

**Figure S3. Screening results validated through metabolic flux measurements and fitness assays; related to Figure 3.** (A, B) Metabolic validation of DKO interaction in *ENO1/ENO3*. DKO significantly lowered flux through glycolysis over control or SKOs. A, measurement of labeled Lactate. B, measurement of labeled Alanine. † indicates statistical significance ( $p < 0.05$ ) for all conditions as compared to DKO. (C) SKO competition assay of oxPPP genes in HeLa (left) and A549 (right) cells. HeLa data replicated from Figure 3L and log transformed for comparison. (D) Deep sequencing analysis of indels (insertions and deletions) introduced by CRISPR-Cas9 at 10 days after transduction of *G6PD* or *PGD* gRNA constructs. (E) Deep sequencing analysis of indels introduced by CRISPR-Cas9 at two weeks after transduction of *KEAP1* gRNA constructs in HeLa cells. Ordinate shows the read counts of indels at each corresponding location. Most cells were successfully targeted after transduction of gRNAs, while only a background level of mutagenesis was observed in the cells transduced with non-targeting control gRNAs. These experiments suggest high targeting efficiency in both the A549 and HeLa Cas9-stable cell lines. (A-C) Plotted as mean  $\pm$  SEM.

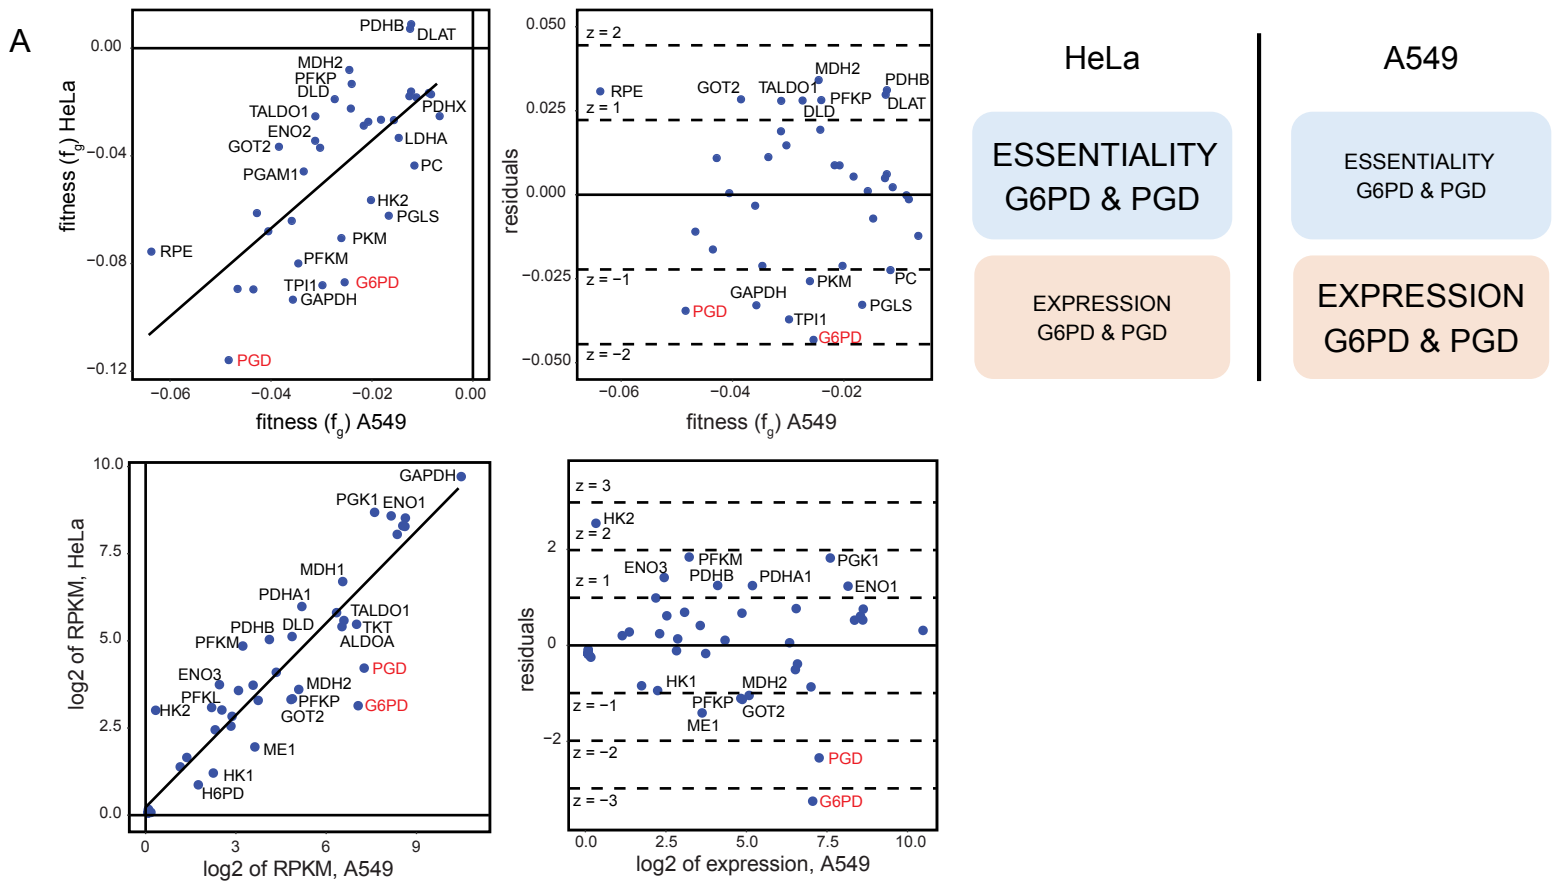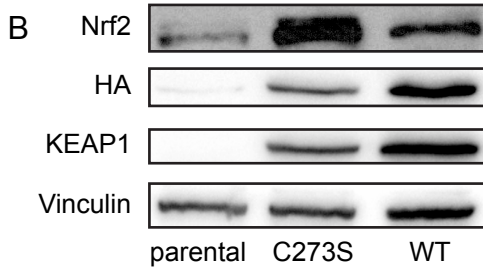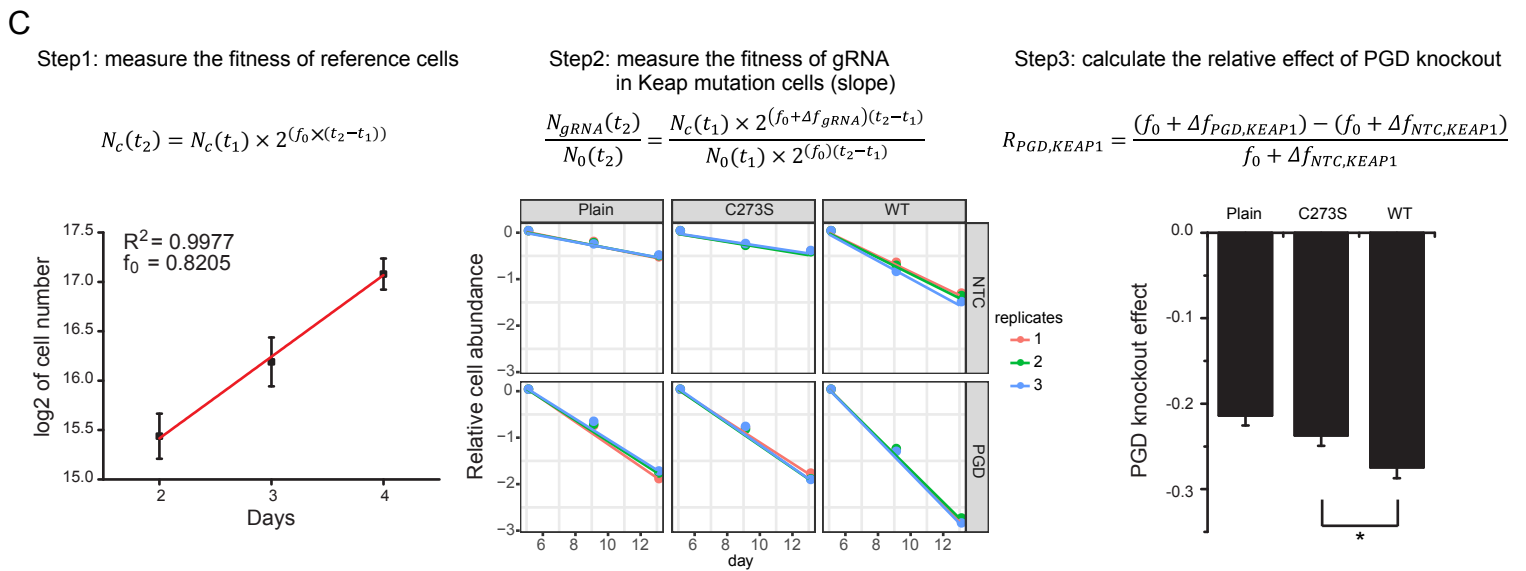

Figure S4.

**Figure S4. *KEAP1* mutational status alters redox metabolism and impact of oxPPP gene knockouts on cellular fitness; related to Figure 4.** (A) Scatter plots (left) of SKO fitness and gene expression in HeLa versus A549. Residual plots (right) of linear regressions showing the outliers between HeLa and A549. oxPPP genes (*G6PD* and *PGD*) showed more essentiality in HeLa cells versus A549, while their mRNA expression levels are lower in HeLa cells versus A549. (B) Immunoblot of A549s with *KEAP1* mutant panel. Superfluous lane (negative control) removed from image. (C) Measurement of relative *PGD* perturbation effect in A549 cells across *KEAP1* mutant panel. Growth curve of the reference cells, which is tdtomato+ cells in this case, and its absolute fitness ( $f_0$ ) was extracted by counting average cell numbers in three independent experiments for three days. The fitness of *PGD* perturbation ( $\Delta f_{PGD,KEAP1}$ ) relative to non-targeting controls (NTC) in *KEAP1* mutation cells were measured by competitive assay. Finally, by incorporating also the absolute fitness of reference cells, the relative effects of *PGD* perturbation ( $R_{PGD,KEAP1}$ ) in *KEAP1* mutant cells was calculated.
